# Supplementary material for: Differences in IgG Fc Glycosylation Are Associated with Outcome of Pediatric Meningococcal Sepsis
Source: PubMed Central journal article supplement (PMC6016251; doi:10.1128/mbio.00546-18), 2018-06-19
Supplement: mbo003183922st4.pdf [file mbo003183922st4.pdf]

|                                  | 0 to 18 years old |                  |                 |
|----------------------------------|-------------------|------------------|-----------------|
|                                  | Healthy           | Patients         | <i>p</i> -value |
|                                  | Median % (IQR)    | Median % (IQR)   |                 |
| IgG1 Hybrid-type                 | 0.41 (0.34-0.46)  | 0.42 (0.35-0.49) | 0.54            |
| IgG1 Bisection                   | 9.5 (8-11.6)      | 11.1 (9.6-13.1)  | 0.0044          |
| IgG1 Fucosylation                | 97.8 (96.9-98.2)  | 96.1 (94.9-97.6) | <b>2.30E-05</b> |
| IgG1 Galactosylation             | 61.2 (56.6-63.7)  | 60.5 (57.2-62.7) | 0.68            |
| IgG1 Sialylation                 | 10.6 (9.5-11.8)   | 10.4 (9.3-11.7)  | 0.67            |
| IgG1 Sialylation per galactose   | 17.6 (16.1-18.6)  | 17.6 (16-18.6)   | 0.87            |
| IgG2/3 Hybrid-type               | 0.36 (0.32-0.43)  | 0.35 (0.28-0.43) | 0.72            |
| IgG2/3 Bisection                 | 8.8 (7.7-10.5)    | 9.6 (8.5-10.4)   | 0.14            |
| IgG2/3 Fucosylation              | 98.3 (97.7-98.4)  | 97.8 (97.5-98.2) | 0.043           |
| IgG2/3 Galactosylation           | 52.7 (48.9-55.4)  | 51.8 (48.8-55.3) | 0.92            |
| IgG2/3 Sialylation               | 10.7 (9.2-12.9)   | 10.8 (9.7-11.9)  | 0.91            |
| IgG2/3 Sialylation per galactose | 20.9 (19.2-22.8)  | 20.5 (19.7-22.8) | 0.87            |
| IgG4 Bisection                   | 12.7 (10.6-15.2)  | 14.5 (11.4-16.1) | 0.27            |
| IgG4 Galactosylation             | 53.0 (47.6-57.9)  | 54.3 (50.8-57.8) | 0.34            |
| IgG4 Sialylation                 | 13.7 (11.5-14.7)  | 13.4 (12.1-15)   | 0.78            |
| IgG4 Sialylation per galactose   | 25.1 (24-27)      | 24.7 (22.9-26.6) | 0.47            |

|                                  | 0 to 3.9 years old |                  |                 |
|----------------------------------|--------------------|------------------|-----------------|
|                                  | Healthy            | Patients         | <i>p</i> -value |
|                                  | Median % (IQR)     | Median % (IQR)   |                 |
| IgG1 Hybrid-type                 | 0.45 (0.43-0.52)   | 0.45 (0.41-0.53) | 0.8             |
| IgG1 Bisection                   | 8.4 (7.4-10.3)     | 11.0 (9.2-12.9)  | <b>0.002</b>    |
| IgG1 Fucosylation                | 98.1 (97.8-98.4)   | 96.1 (94.2-97.3) | <b>1.90E-06</b> |
| IgG1 Galactosylation             | 61.9 (56.7-63.6)   | 61.6 (58.4-63.3) | 0.82            |
| IgG1 Sialylation                 | 11.3 (10.1-12.8)   | 10.6 (9.7-11.9)  | 0.15            |
| IgG1 Sialylation per galactose   | 18.4 (17.7-19.7)   | 17.8 (16.9-18.7) | 0.037           |
| IgG2/3 Hybrid-type               | 0.43 (0.40-0.54)   | 0.39 (0.30-0.49) | 0.095           |
| IgG2/3 Bisection                 | 7.4 (6.3-8.1)      | 9.7 (8.8-11.2)   | 0.004           |
| IgG2/3 Fucosylation              | 98.4 (98.3-98.7)   | 97.7 (97.5-98.1) | 0.0057          |
| IgG2/3 Galactosylation           | 54.5 (46.7-58.1)   | 51.4 (49.2-53.6) | 0.51            |
| IgG2/3 Sialylation               | 13.1 (9.3-14.3)    | 10.6 (9.7-11.7)  | 0.21            |
| IgG2/3 Sialylation per galactose | 23.7 (21.4-24.7)   | 21.1 (19.5-22.6) | 0.014           |
| IgG4 Bisection                   | 13.2 (10.6-14.5)   | 15.5 (13.5-16)   | 0.17            |
| IgG4 Galactosylation             | 51.6 (44.5-54.9)   | 54.5 (52.5-58.2) | 0.07            |
| IgG4 Sialylation                 | 14.1 (11.3-14.9)   | 13.6 (12.4-14.7) | 0.85            |
| IgG4 Sialylation per galactose   | 26.5 (25.2-28.6)   | 24.9 (23-26.7)   | 0.15            |

|                                | 4 to 18 years old |                  |                 |
|--------------------------------|-------------------|------------------|-----------------|
|                                | Healthy           | Patients         | <i>p</i> -value |
|                                | Median % (IQR)    | Median % (IQR)   |                 |
| IgG1 Hybrid-type               | 0.35 (0.31-0.38)  | 0.34 (0.31-0.40) | 0.84            |
| IgG1 Bisection                 | 10.5 (9.2-11.9)   | 11.8 (10-13.1)   | 0.16            |
| IgG1 Fucosylation              | 97.0 (96.1-97.5)  | 95.9 (95.5-97.4) | 0.1             |
| IgG1 Galactosylation           | 59.7 (55.2-64)    | 58.4 (56.8-62.5) | 0.65            |
| IgG1 Sialylation               | 9.8 (8.6-10.8)    | 9.5 (8.4-11)     | 0.99            |
| IgG1 Sialylation per galactose | 16.2 (15.1-17.4)  | 16.5 (15.1-17.8) | 0.68            |
| IgG2/3 Hybrid-type             | 0.33 (0.27-0.36)  | 0.31 (0.27-0.37) | 0.88            |
| IgG2/3 Bisection               | 9.5 (8.5-10.8)    | 9.6 (8.4-10.2)   | 0.86            |
| IgG2/3 Fucosylation            | 98.0 (97.7-98.3)  | 98.0 (97.5-98.2) | 0.67            |
| IgG2/3 Galactosylation         | 52.5 (48.9-54.8)  | 54.5 (49.3-56.8) | 0.31            |

|                                         |                  |                  |      |
|-----------------------------------------|------------------|------------------|------|
| <b>IgG2/3 Sialylation</b>               | 10.1 (9.2-11.4)  | 10.8 (9.5-12.8)  | 0.46 |
| <b>IgG2/3 Sialylation per galactose</b> | 20.4 (18.8-21.5) | 20.2 (19.7-21.8) | 0.63 |
| <b>IgG4 Bisection</b>                   | 12.7 (10.6-15.3) | 12.0 (11.4-16.2) | 0.88 |
| <b>IgG4 Galactosylation</b>             | 53.5 (48.2-58.4) | 54.1 (49.8-57.7) | 1    |
| <b>IgG4 Sialylation</b>                 | 13.7 (11.8-14.7) | 12.9 (11.1-14.7) | 0.65 |
| <b>IgG4 Sialylation per galactose</b>   | 24.6 (23.4-25.9) | 24.6 (22.3-25.7) | 0.67 |

$\alpha$

0.0027
